# Supplementary material
Source: publisher site journal article supplement (https://www.dovepress.com/article/317648)
Supplement: Supplementary file 1 [file get_supplementary_file.php]

**Supplemental File 1. Patient Screener**

Patient Screener

| **Patient IDI’s** |
| --- |
| - 4 In-Home Patient/Caregiver Dyad’s per Market - Gender target of 75% Female, 25% Male (final mix will likely fall out directly from recruitment) - Recruit 18 years of age or older (average age to target is 25-45 years old) - Diagnosed with CRPS, experiencing Type I CRPS symptoms - Open to trying/switching to a new medication |

1. Record respondent’s gender:

- Target 75% Female, 25% Male
  1. Male
  2. Female

1. What is your age?

- Record exact age
- Expect to see average ages around 45 years old
- Must be at least 18 years old to participate

Record: __________________

1. Have you ever been diagnosed by a physician as having Complex Regional Pain Syndrome (CRPS), also known as Reflex Sympathetic Dystrophy Syndrome (RSDS)?
   1. Yes
   2. No **TERMINATE**
2. Has your Complex Regional Pain Syndrome (CRPS) been categorized as Type I or Type II?
   1. Type I
   2. Type II **TERMINATE**
3. Do you have continuing pain in one of your limbs (hands or feet) due to an injury or some other event that normally should not result in persistent pain?
   1. Yes CONTINUE
   2. No **TERMINATE**
4. Have you been diagnosed with Peripheral Neuropathy (associated with fibromyalgia)?
   1. Yes **TERMINATE**
   2. No
5. Do you have continuing pain in your lower back, trunk, pelvic region, breast or face that normally should not result in persistent pain?

- Information Only
  1. Yes
  2. No

1. The following questions about your CRPS symptoms will help us asses if you may be eligible for this study. Which, if any, of the following describe you or an experience you’ve had?

- Select all that apply
- Must select at least 3 symptoms, otherwise **HOLD**

1. Do you have pain following an event that is normally not painful, such as pain due to a light touch, wearing clothes or feeling wind against your skin?
2. Do you have pain in the affected limb when pressure is placed on the affected area?
3. Do you have intense pain, or have the pain sensation for an extended period of time, due to an event that normally would provide only mild or short-duration pain, such as stubbing your toe or stepping into hot water?
4. Do you feel that your affected limb is warmer/colder than the rest of your other limbs?
5. Does your affected limb skin color look different than the rest of your other limbs?
6. Does your affected limb feel more sweat/clammy compared to your other limb?
7. Does your affected limb feel more swollen compared to your other limb?
8. Are there any changes regarding your nails, hair or skin on your affected limb?
9. Do you have weakness, tremors, involuntary jerking or twitching, contraction or locking of muscles in an unusual position, or decreased range of motion in the affected limb?
10. How long ago were you diagnosed by a healthcare physician as having CRPS?

- Recruit a mix, skew towards patients diagnosed 5+ years ago
  1. Less than 1 year **HOLD**
  2. 1 – 2 years
  3. 2 – 4 years
  4. 5 or more years

1. Which of the following healthcare providers have you visited for the treatment of your CRPS in the past year?

- Select all that apply
- Information only; Recruiter note: target referrals for physician IDIs
  1. Primary Care Physician
  2. Neurologist
  3. Psychologist
  4. Pain Specialist
  5. Physical Therapist
  6. Rehabilitation Clinician
  7. Rheumatologist
  8. Orthopedic Doctor
  9. Other: ____________________
  10. None of the above

1. Have you ever used a prescription medication for the treatment of your CRPS symptoms?
   1. Yes
   2. No **HOLD**
2. Are you currently using a prescription medication for the treatment of your CRPS symptoms?

- Recruiter Note: Do not take more than 25% of sample who are not currently treating
  1. Yes CONTINUE
  2. No Skip to Q. 14
     1. (Record medication taken in the past: ____________)
     2. (Record duration since last took medication: ____________)

1. Which of the following types of prescription medication, if any, are you currently using to treat your CRPS?
   1. Antidepressants
   2. Anti-inflammatories
   3. COX-inhibitors
   4. GABA analogs
   5. Opioids
   6. Other: ________________ **HOLD**
2. On a scale of 1 to 6, please rate how much you agree or disagree with each of the following statements (where 1 means strongly disagree and 6 means strongly agree):

- All respondents must disagree (select 1, 2, or 3) with statements “a” and “b”, otherwise **HOLD**
- All respondents must agree (select 4, 5, or 6) with statement “c” and “d”, otherwise **HOLD**

| **Statement** | **Rating** |
| --- | --- |
| a. I am satisfied with my current CRPS treatment plan and providers |  |
| b. I am experiencing a reduction in pain as a result of my current CRPS and/or pain medication |  |
| c. I would be open to switching medications for the treatment of my CRPS |  |
| d. I have tried multiple therapies and would be open to trying alternatives to my current treatment |  |

1. Are you or any member of your immediate family currently a physician, nurse, pharmacist, or affiliated with any pharmaceutical manufacturer?
   1. Yes (Record Relation: _______________ )
   2. No
2. Are you or any member of your immediate family currently affiliated with any marketing, advertising, market research company or for any newspaper, magazine, radio, TV station or any other news organization?
   1. Yes (Record Relation: _______________ )
   2. No
3. Which of the following best describes your ethnicity?
   1. African-American
   2. Asian
   3. Caucasian
   4. Hispanic/ Latino
   5. Other: ___________

Please provide the name and contact information for the person responsible for supporting and assisting you with your disease management, medication management and/or everyday life accommodations.

Name: _____________________________________________

Relation: ___________________________________________

City/State: __________________________________________

Phone/Email: ________________________________________

Please provide your contact information and availability to participate:

Name: __________________________________________

Location: _________________________________________

Cell Phone: _______________________________________

Email: ___________________________________________

Availability for Interview: ____________________________

**Supplemental File 2. Caregiver Screener**

Support Partner/Caregiver Screener

| **Support Partner/Caregiver Dyads** |
| --- |
| - 4 In-Home Support Partner/Caregiver and Patient Dyads per market - 18 years of age or older - Family member (immediate or extended), friend, support partner, or professional caregiver of a patient diagnosed with CRPS - Responsible for supporting and assisting patient in their health management, medication management and everyday life accommodations (picks up prescriptions, transports/accompanies patient to doctor’s appointments, administers medications, etc.) |
| **Total = 20 Respondents** |

1. Record respondent’s gender:

- Information only

1. Male
2. Female
3. What is your age?

- Record exact age
- Must be over the age of 18, otherwise **TERMINATE**

Record age: __________

1. Have any members of your family or close friends been diagnosed by a healthcare professional with any of the following, or are you a professional caregiver for individuals with any of the following?

- Check all that apply
- Must select CRPS, otherwise **TERMINATE**

1. Autism
2. Cystic Fibrosis
3. Chronic Obtrusive Pulmonary Disorder (COPD)
4. Diabetes
5. Complex Regional Pain Syndrome (CRPS)
6. Other: _________________
7. None of the above **TERMINATE**
8. Do you currently provide care for this person with CRPS?
9. Yes
10. No **TERMINATE; request referral to caregiver**
11. Please describe the symptoms the person you care for experiences as a result of CRPS.

- Recruiter: listen for symptoms such as burning pain, swelling and/or stiffness in affected joints, decreased motor ability, changes in nail/hair growth and changes in skin. If description does not match, **HOLD**.

Current Symptoms: ______________________________________________________________

1. Please indicate the age of the person with CRPS you care.

- Record exact age

Record age: __________

1. Which of the following best describes your relationship to the person who has been diagnosed with CRPS for whom you care?

- Information only

1. Immediate family (mother/father/sister/brother/child)
2. Extended family or relative (aunt/uncle/cousin/grandparent)
3. Partner
4. Close friend
5. No relation – I am a volunteer who takes care of the patient
6. Client – I am a professional caregiver/home health aide
7. Other: ________________________
8. Do you live with the person you care for with CRPS?

- Information only

1. Yes
2. No
3. Thinking about your role as a support partner/caregiver for this person, which of the following are true?

- Select all that apply
- Must select 2 or more responses, otherwise **HOLD**

1. You oversee patient taking his/her medications
2. You assist patient with documentation requirements or obtaining medications from pharmacy
3. You confer with patient’s doctor/healthcare professional about symptom management
4. You accompany patient to doctor/healthcare professional appointments/treatment sessions
5. You offer emotional support/listen and advise
6. You are the primary or joint decision maker for the patient regarding their healthcare and choice of medications
7. Approximately how many years have you been actively involved in helping this person manage their CRPS?

- Information only

1. Less than 1 year
2. 1 – 2 years
3. 2 – 5 years
4. 5 – 10 years
5. Over 10 years
6. How old was this person when they were first diagnosed by a physician as having CRPS?

- Information only

Record age: ________

1. Approximately how many hours each week are you involved with caring for this person?

- Information only

1. 5 hours or less
2. 5 – 10 hours
3. 10 – 21 hours
4. 21 – 35 hours
5. 35 hours or more
6. Which of the following healthcare providers has this person visited for treatment of their CRPS within the last year?

- Select all that apply
- Information only

1. Primary Care Physicians
2. Physical Therapists
3. Rehab Clinicians
4. Pain Specialist
5. Rheumatologist
6. Psychologist
7. Orthopedic Doctor
8. Other: __________
9. None of the above
10. Has this person ever used a prescription medication for the treatment of their CRPS?

- Information only

1. Yes CONTINUE
2. No **TERMINATE**
3. Is this person currently using a prescription medication for the treatment of their CRPS, or symptoms of CRPS?

- Recruiter Note: Do not take more than 25% of sample who are not currently treating
  1. Yes CONTINUE
  2. No Skip to Q. 17
     1. (Record medication taken in the past: ____________)
     2. (Record duration since last took medication: ____________)

1. Which of the following types of prescription medication, if any, are they currently using to treat their CRPS?
   1. Antidepressants
   2. Anti-inflammatories
   3. COX-inhibitors
   4. GABA analogs
   5. Opioids
   6. Other: ________________ **HOLD**
2. Are you or any member of your immediate family currently a physician, nurse, pharmacist or affiliated with any pharmaceutical manufacturer?

- Information only

1. Yes (Record relation: _________________)
2. No
3. Are you or any member of your immediate family currently affiliated with any marketing, advertising, market research company or any newspaper, magazine, radio, TV station or any other news organization?

- Information only

1. Yes (Record relation: _______________)
2. No

Please provide the name and contact information for the person diagnosed with CRPS you are responsible.

Name: __________________________________________

Relation: ________________________________________

Location: ________________________________________

Cell Phone: ______________________________________

Email: __________________________________________

Record respondent’s information:

Name: __________________________________________

Location: _________________________________________

Cell Phone: ______________________________________

Email: __________________________________________

Availability for Interview: ___________________________

**Supplemental File 3. HCP Screener**

Clinician Screener

| **In-Office IDI’s** |
| --- |
| - 8 IDI’s & 1 Round Table per Market - Targeted specialists who are managing at least 5 CRPS patient cases per year (experiencing Type I symptoms), in relevant settings (office, hospital, clinics) - Aware of primary existing treatments and new treatment developments |

1. What is the primary medical specialty for which you are board certified?

- Recruit mix of target physician types

1. Primary Care Physician CONTINUE
2. Neurologist CONTINUE
3. Physical Therapist / Rehab Clinician CONTINUE
4. Pain Specialist CONTINUE
5. Rheumatologist CONTINUE
6. Psychologist CONTINUE
7. Orthopedic Doctor CONTINUE
8. Other: _________________________ **HOLD**
9. How many years of experience do you have in your current specialty?
   1. Fewer than two years **HOLD**
   2. Two years to 35 years CONTINUE
   3. Over 35 years **HOLD**
10. In which of the following settings do you practice/work?

- Select all that apply
- Information only

1. Office based practice
2. Academic hospital
3. Non-academic hospital
4. Specialty clinic
5. Other: ___________________
6. Do you treat/see patients with Complex Regional Pain Syndrome (CRPS)
7. Yes
8. No **TERMINATE**
9. Are you actively managing patients with CRPS?
   1. Yes SKIP TO Q. 7
   2. No CONTINUE
10. (Ask only if selects “No” in Q. 5) How long has it been since you last treated/managed a patient for CRPS?
11. Less than 6 months CONTINUE
12. 6 months – 1 year CONTINUE
13. Over 1 year **HOLD**
14. How many respondents with CRPS Type 1 have you treated in the past year?

- Target respondents who have treated 5 or more patients with CRPS Type 1 in the past year, otherwise HOLD
- After fielding initial results, recruiter to circle back with Grunenthal on whether threshold should be adjusted up or down based on response data

Record: ___________________________

1. Are you aware of other physicians and/or specialists your CRPS patient(s) are currently seeing or who directly refer CRPS patients to you?

- Recruiter: Listen for targeted physician types and specialties
- Information only
  1. Yes (Record Type: ___________________)
  2. No

1. Do you refer your patients to other physicians and/or specialists for the treatment of their Type I CRPS symptoms?

- Information only
  1. Yes (Record Type: ___________________)
  2. No

1. How often do you prescribe medication for the treatment of CRPS each year?

Record: ___________________________

1. What are the primary treatments you typically use to manage CRPS patients and/or medications you are prescribing?

Record: ________________________________________________________________

1. What new treatment developments for CRPS or in research in CRPS are you aware of, if any?

- Information only

Record: __________________________________________________________

1. Please identify which of the following best describes your comfort level managing CRPS patients?
   1. Very comfortable – I serve as a resource for my peers and colleagues CONTINUE as “Savvy”
   2. Comfortable – I effectively manage my patient cases independently CONTINUE as “Savvy”
   3. Somewhat uncomfortable – I rely on resources and peer support for these cases CONTINUE as “Novice”
2. Do you or any member of your household work for …
   1. A market research firm **HOLD**
   2. Any manufacturer or marketer of biopharmaceutical products **HOLD**
   3. A pharmaceutical company **HOLD**

Name: ____________________________________ Availability for Interview: ______________________

Market/ Facility: _____________________________ Honorarium: ________________________________

Cell Phone: ________________________________ Screened by:________________________________

Email: ____________________________________
